# Supplementary material for: The Public and Professionals Reason Similarly about the Management of Non-Native Invasive Species: A Quantitative Investigation of the Relationship between Beliefs and Attitudes
Source: PubMed Central journal article supplement (PMC4149425; doi:10.1371/journal.pone.0105495), 2014-08-29
Supplement: pone.0105495.s001.pdf [file pone.0105495.s001.pdf]

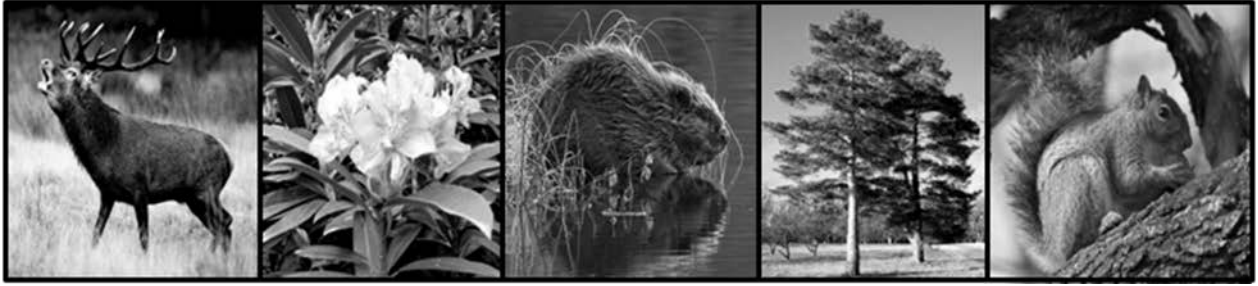

# Your views on animal and plant species in Scotland

Aberdeen, June 2010

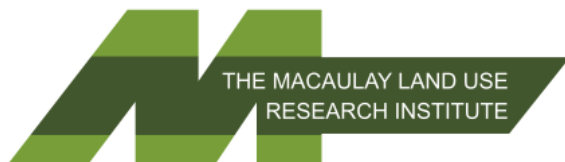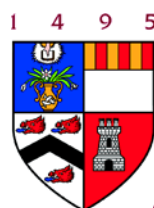

UNIVERSITY  
OF ABERDEEN

Dear participant,

Thank you very much for your interest in this questionnaire!

### **What is the purpose of this research?**

Recently, there has been a lot of discussion about changes in our natural environment, for example, changes in animal and plant populations in Scotland. In some cases, you might feel that something should be done. However, there is a wide range of options that policymakers and landmanagers can choose to manage animal and plant species. What is your view?

This questionnaire aims to find out more about what is important to people when they make judgments about species and their management. This knowledge is essential to improve communication between the public and policymakers.

### **What are we asking you to do?**

**We will ask you questions about your views on:**

- 1) Environmental changes in Scotland
- 2) Several plant and animal species
- 3) How you see the relationship between humans and nature.

**Answering the questionnaire will take about 20 minutes. Please follow the instructions carefully:**

- 1) The questions should be filled in by one person only, without consulting others.
- 2) Unless otherwise mentioned, you can only choose one answer.
- 3) Don't skip any questions! It is important for us that you answer every question.
- 4) In case you feel the question is not applicable to the species or you don't know what to answer, please make use of the "don't know" option.
- 5) Don't think too long about the questions. In most cases, your first impression will be the best.

**There are no right or wrong responses! We are only interested in your personal opinion.**

### **What will happen with the information you provide?**

Of course, the information you give will be kept absolutely confidential and analysed carefully. A summary of the results will be sent to Scottish Natural Heritage.

Thank you for your help! We are very grateful for your response.

Sebastian Selge (for questions and concerns please call: 01224-395-308)

Below are statements regarding current environmental changes in Scotland. In your view, do policymakers in Scotland pay enough attention to the following topics?

|                              | not enough            |                       | enough                |                       | too much              |
|------------------------------|-----------------------|-----------------------|-----------------------|-----------------------|-----------------------|
| species extinctions          | <input type="radio"/> | <input type="radio"/> | <input type="radio"/> | <input type="radio"/> | <input type="radio"/> |
| reforestation                | <input type="radio"/> | <input type="radio"/> | <input type="radio"/> | <input type="radio"/> | <input type="radio"/> |
| pollution                    | <input type="radio"/> | <input type="radio"/> | <input type="radio"/> | <input type="radio"/> | <input type="radio"/> |
| people's awareness of nature | <input type="radio"/> | <input type="radio"/> | <input type="radio"/> | <input type="radio"/> | <input type="radio"/> |
| global warming               | <input type="radio"/> | <input type="radio"/> | <input type="radio"/> | <input type="radio"/> | <input type="radio"/> |
| conservation projects        | <input type="radio"/> | <input type="radio"/> | <input type="radio"/> | <input type="radio"/> | <input type="radio"/> |
| non-native species           | <input type="radio"/> | <input type="radio"/> | <input type="radio"/> | <input type="radio"/> | <input type="radio"/> |
| organic farming              | <input type="radio"/> | <input type="radio"/> | <input type="radio"/> | <input type="radio"/> | <input type="radio"/> |

In case you feel we missed out an environmental topic that is very important to you, please write it down here:

---



---



---

In the following section you will see questions that look like this:

---

I like red deer      I don't like red deer

---

If you feel you like red deer very much, please make a cross on the left hand end of the scale next to "I like red deer". However, if you don't like red deer at all cross the circle on the other side next to "I don't like red deer". If your views fall somewhere in between, please choose the appropriate circle between the extremes. If you feel the question **cannot** be answered or if you do not know what to answer, please use the "**don't know N/A**"-option! All questions refer to Scotland.

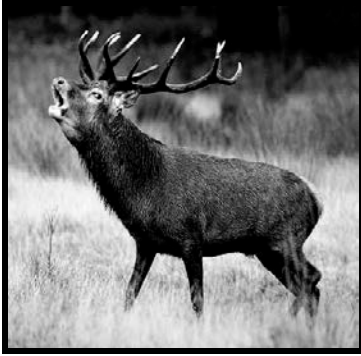

## Red deer

|                             |                       |                       |                       |                       |                       |                               |
|-----------------------------|-----------------------|-----------------------|-----------------------|-----------------------|-----------------------|-------------------------------|
| I am familiar with red deer | <input type="radio"/> | <input type="radio"/> | <input type="radio"/> | <input type="radio"/> | <input type="radio"/> | I am unfamiliar with red deer |
| I like red deer             | <input type="radio"/> | <input type="radio"/> | <input type="radio"/> | <input type="radio"/> | <input type="radio"/> | I don't like red deer         |

In your view, how would you describe red deer with respect to the following attributes? don't know  
N/A

|                                   |                       |                       |                       |                       |                       |                                      |                       |
|-----------------------------------|-----------------------|-----------------------|-----------------------|-----------------------|-----------------------|--------------------------------------|-----------------------|
| ugly                              | <input type="radio"/> | <input type="radio"/> | <input type="radio"/> | <input type="radio"/> | <input type="radio"/> | beautiful                            | <input type="radio"/> |
| detrimental to the economy        | <input type="radio"/> | <input type="radio"/> | <input type="radio"/> | <input type="radio"/> | <input type="radio"/> | beneficial to the economy            | <input type="radio"/> |
| beneficial to nature              | <input type="radio"/> | <input type="radio"/> | <input type="radio"/> | <input type="radio"/> | <input type="radio"/> | detrimental to nature                | <input type="radio"/> |
| non-native                        | <input type="radio"/> | <input type="radio"/> | <input type="radio"/> | <input type="radio"/> | <input type="radio"/> | native                               | <input type="radio"/> |
| accidentally introduced           | <input type="radio"/> | <input type="radio"/> | <input type="radio"/> | <input type="radio"/> | <input type="radio"/> | intentionally introduced             | <input type="radio"/> |
| uncontrollable                    | <input type="radio"/> | <input type="radio"/> | <input type="radio"/> | <input type="radio"/> | <input type="radio"/> | controllable                         | <input type="radio"/> |
| rare                              | <input type="radio"/> | <input type="radio"/> | <input type="radio"/> | <input type="radio"/> | <input type="radio"/> | overabundant                         | <input type="radio"/> |
| introduced by humans              | <input type="radio"/> | <input type="radio"/> | <input type="radio"/> | <input type="radio"/> | <input type="radio"/> | natural range expansion              | <input type="radio"/> |
| <u>not</u> a severe problem       | <input type="radio"/> | <input type="radio"/> | <input type="radio"/> | <input type="radio"/> | <input type="radio"/> | a severe problem                     |                       |
| need to reduce numbers            | <input type="radio"/> | <input type="radio"/> | <input type="radio"/> | <input type="radio"/> | <input type="radio"/> | <u>no</u> need to reduce numbers     |                       |
| killing red deer is <u>not</u> ok | <input type="radio"/> | <input type="radio"/> | <input type="radio"/> | <input type="radio"/> | <input type="radio"/> | killing red deer is ok               |                       |
| has same rights as humans         | <input type="radio"/> | <input type="radio"/> | <input type="radio"/> | <input type="radio"/> | <input type="radio"/> | has <u>not</u> same rights as humans |                       |
|                                   |                       |                       |                       |                       |                       |                                      |                       |

When deciding if the red deer requires management, how important are the following categories to **you**?

|                                       | not at all important  | un-important          | neither nor           | important             | very important        |
|---------------------------------------|-----------------------|-----------------------|-----------------------|-----------------------|-----------------------|
| beautiful/ugly                        | <input type="radio"/> | <input type="radio"/> | <input type="radio"/> | <input type="radio"/> | <input type="radio"/> |
| beneficial/detrimental to economy     | <input type="radio"/> | <input type="radio"/> | <input type="radio"/> | <input type="radio"/> | <input type="radio"/> |
| beneficial/detrimental to nature      | <input type="radio"/> | <input type="radio"/> | <input type="radio"/> | <input type="radio"/> | <input type="radio"/> |
| native/non-native                     | <input type="radio"/> | <input type="radio"/> | <input type="radio"/> | <input type="radio"/> | <input type="radio"/> |
| intentionally/accidentally introduced | <input type="radio"/> | <input type="radio"/> | <input type="radio"/> | <input type="radio"/> | <input type="radio"/> |
| controllable/uncontrollable           | <input type="radio"/> | <input type="radio"/> | <input type="radio"/> | <input type="radio"/> | <input type="radio"/> |
| rare/overabundant                     | <input type="radio"/> | <input type="radio"/> | <input type="radio"/> | <input type="radio"/> | <input type="radio"/> |
| human-caused/natural                  | <input type="radio"/> | <input type="radio"/> | <input type="radio"/> | <input type="radio"/> | <input type="radio"/> |

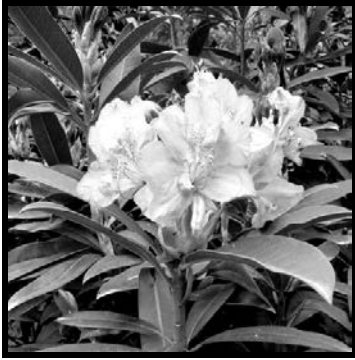

## Rhododendron ponticum

|                                 |                       |                       |                       |                       |                       |                                   |
|---------------------------------|-----------------------|-----------------------|-----------------------|-----------------------|-----------------------|-----------------------------------|
| I am familiar with rhododendron | <input type="radio"/> | <input type="radio"/> | <input type="radio"/> | <input type="radio"/> | <input type="radio"/> | I am unfamiliar with rhododendron |
| I like rhododendron             | <input type="radio"/> | <input type="radio"/> | <input type="radio"/> | <input type="radio"/> | <input type="radio"/> | I don't like rhododendron         |

In your view, how would you describe rhododendron with respect to the following attributes? don't know  
N/A

|                                    |                       |                       |                       |                       |                       |                                      |                       |
|------------------------------------|-----------------------|-----------------------|-----------------------|-----------------------|-----------------------|--------------------------------------|-----------------------|
| ugly                               | <input type="radio"/> | <input type="radio"/> | <input type="radio"/> | <input type="radio"/> | <input type="radio"/> | beautiful                            | <input type="radio"/> |
| detrimental to the economy         | <input type="radio"/> | <input type="radio"/> | <input type="radio"/> | <input type="radio"/> | <input type="radio"/> | beneficial to the economy            | <input type="radio"/> |
| beneficial to nature               | <input type="radio"/> | <input type="radio"/> | <input type="radio"/> | <input type="radio"/> | <input type="radio"/> | detrimental to nature                | <input type="radio"/> |
| non-native                         | <input type="radio"/> | <input type="radio"/> | <input type="radio"/> | <input type="radio"/> | <input type="radio"/> | native                               | <input type="radio"/> |
| accidentally introduced            | <input type="radio"/> | <input type="radio"/> | <input type="radio"/> | <input type="radio"/> | <input type="radio"/> | intentionally introduced             | <input type="radio"/> |
| uncontrollable                     | <input type="radio"/> | <input type="radio"/> | <input type="radio"/> | <input type="radio"/> | <input type="radio"/> | controllable                         | <input type="radio"/> |
| rare                               | <input type="radio"/> | <input type="radio"/> | <input type="radio"/> | <input type="radio"/> | <input type="radio"/> | overabundant                         | <input type="radio"/> |
| introduced by humans               | <input type="radio"/> | <input type="radio"/> | <input type="radio"/> | <input type="radio"/> | <input type="radio"/> | natural range expansion              | <input type="radio"/> |
| <u>not</u> a severe problem        | <input type="radio"/> | <input type="radio"/> | <input type="radio"/> | <input type="radio"/> | <input type="radio"/> | a severe problem                     |                       |
| need to reduce numbers             | <input type="radio"/> | <input type="radio"/> | <input type="radio"/> | <input type="radio"/> | <input type="radio"/> | <u>no</u> need to reduce numbers     |                       |
| killing rhododendron is <u>not</u> | <input type="radio"/> | <input type="radio"/> | <input type="radio"/> | <input type="radio"/> | <input type="radio"/> | killing rhododendron is ok           |                       |
| has same rights as humans          | <input type="radio"/> | <input type="radio"/> | <input type="radio"/> | <input type="radio"/> | <input type="radio"/> | has <u>not</u> same rights as humans |                       |

When deciding if rhododendron require management, how important are the following categories to **you**?

|                                       | not at all important  | un-important          | neither nor           | important             | very important        |
|---------------------------------------|-----------------------|-----------------------|-----------------------|-----------------------|-----------------------|
| beautiful/ugly                        | <input type="radio"/> | <input type="radio"/> | <input type="radio"/> | <input type="radio"/> | <input type="radio"/> |
| beneficial/detrimental to economy     | <input type="radio"/> | <input type="radio"/> | <input type="radio"/> | <input type="radio"/> | <input type="radio"/> |
| beneficial/detrimental to nature      | <input type="radio"/> | <input type="radio"/> | <input type="radio"/> | <input type="radio"/> | <input type="radio"/> |
| native/non-native                     | <input type="radio"/> | <input type="radio"/> | <input type="radio"/> | <input type="radio"/> | <input type="radio"/> |
| intentionally/accidentally introduced | <input type="radio"/> | <input type="radio"/> | <input type="radio"/> | <input type="radio"/> | <input type="radio"/> |
| controllable/uncontrollable           | <input type="radio"/> | <input type="radio"/> | <input type="radio"/> | <input type="radio"/> | <input type="radio"/> |
| rare/overabundant                     | <input type="radio"/> | <input type="radio"/> | <input type="radio"/> | <input type="radio"/> | <input type="radio"/> |
| human-caused/natural                  | <input type="radio"/> | <input type="radio"/> | <input type="radio"/> | <input type="radio"/> | <input type="radio"/> |

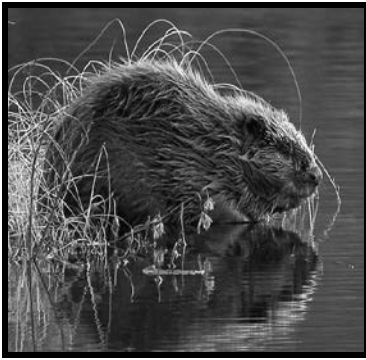

## Beaver

|                               |                       |                       |                       |                       |                       |                                 |
|-------------------------------|-----------------------|-----------------------|-----------------------|-----------------------|-----------------------|---------------------------------|
| I am familiar with the beaver | <input type="radio"/> | <input type="radio"/> | <input type="radio"/> | <input type="radio"/> | <input type="radio"/> | I am unfamiliar with the beaver |
| I like beavers                | <input type="radio"/> | <input type="radio"/> | <input type="radio"/> | <input type="radio"/> | <input type="radio"/> | I don't like beavers            |

In your view, how would you describe the beaver with respect to the following attributes?

|                                  | <input type="radio"/> | <input type="radio"/> | <input type="radio"/> | <input type="radio"/> | <input type="radio"/> |                                      | don't know<br>N/A     |
|----------------------------------|-----------------------|-----------------------|-----------------------|-----------------------|-----------------------|--------------------------------------|-----------------------|
| ugly                             | <input type="radio"/> | <input type="radio"/> | <input type="radio"/> | <input type="radio"/> | <input type="radio"/> | beautiful                            | <input type="radio"/> |
| detrimental to the economy       | <input type="radio"/> | <input type="radio"/> | <input type="radio"/> | <input type="radio"/> | <input type="radio"/> | beneficial to the economy            | <input type="radio"/> |
| beneficial to nature             | <input type="radio"/> | <input type="radio"/> | <input type="radio"/> | <input type="radio"/> | <input type="radio"/> | detrimental to nature                | <input type="radio"/> |
| non-native                       | <input type="radio"/> | <input type="radio"/> | <input type="radio"/> | <input type="radio"/> | <input type="radio"/> | native                               | <input type="radio"/> |
| accidentally introduced          | <input type="radio"/> | <input type="radio"/> | <input type="radio"/> | <input type="radio"/> | <input type="radio"/> | intentionally introduced             | <input type="radio"/> |
| uncontrollable                   | <input type="radio"/> | <input type="radio"/> | <input type="radio"/> | <input type="radio"/> | <input type="radio"/> | controllable                         | <input type="radio"/> |
| rare                             | <input type="radio"/> | <input type="radio"/> | <input type="radio"/> | <input type="radio"/> | <input type="radio"/> | overabundant                         | <input type="radio"/> |
| introduced by humans             | <input type="radio"/> | <input type="radio"/> | <input type="radio"/> | <input type="radio"/> | <input type="radio"/> | natural range expansion              | <input type="radio"/> |
| <u>not</u> a severe problem      | <input type="radio"/> | <input type="radio"/> | <input type="radio"/> | <input type="radio"/> | <input type="radio"/> | a severe problem                     |                       |
| need to reduce numbers           | <input type="radio"/> | <input type="radio"/> | <input type="radio"/> | <input type="radio"/> | <input type="radio"/> | <u>no</u> need to reduce numbers     |                       |
| killing beavers is <u>not</u> ok | <input type="radio"/> | <input type="radio"/> | <input type="radio"/> | <input type="radio"/> | <input type="radio"/> | killing beavers is ok                |                       |
| has same rights as humans        | <input type="radio"/> | <input type="radio"/> | <input type="radio"/> | <input type="radio"/> | <input type="radio"/> | has <u>not</u> same rights as humans |                       |

When deciding if beaver require management, how important are the following categories to **you**?

|                                       | not at all important  | un-important          | neither nor           | important             | very important        |
|---------------------------------------|-----------------------|-----------------------|-----------------------|-----------------------|-----------------------|
| beautiful/ugly                        | <input type="radio"/> | <input type="radio"/> | <input type="radio"/> | <input type="radio"/> | <input type="radio"/> |
| beneficial/detrimental to economy     | <input type="radio"/> | <input type="radio"/> | <input type="radio"/> | <input type="radio"/> | <input type="radio"/> |
| beneficial/detrimental to nature      | <input type="radio"/> | <input type="radio"/> | <input type="radio"/> | <input type="radio"/> | <input type="radio"/> |
| native/non-native                     | <input type="radio"/> | <input type="radio"/> | <input type="radio"/> | <input type="radio"/> | <input type="radio"/> |
| intentionally/accidentally introduced | <input type="radio"/> | <input type="radio"/> | <input type="radio"/> | <input type="radio"/> | <input type="radio"/> |
| controllable/uncontrollable           | <input type="radio"/> | <input type="radio"/> | <input type="radio"/> | <input type="radio"/> | <input type="radio"/> |
| rare/overabundant                     | <input type="radio"/> | <input type="radio"/> | <input type="radio"/> | <input type="radio"/> | <input type="radio"/> |
| human-caused/natural                  | <input type="radio"/> | <input type="radio"/> | <input type="radio"/> | <input type="radio"/> | <input type="radio"/> |

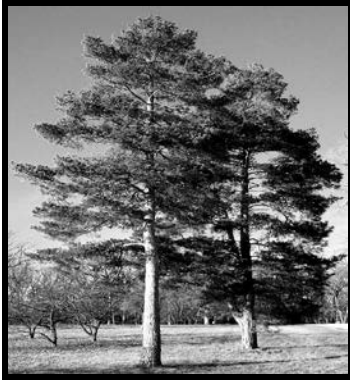

## Scots pine

|                               |                       |                       |                       |                       |                       |                                 |
|-------------------------------|-----------------------|-----------------------|-----------------------|-----------------------|-----------------------|---------------------------------|
| I am familiar with Scots pine | <input type="radio"/> | <input type="radio"/> | <input type="radio"/> | <input type="radio"/> | <input type="radio"/> | I am unfamiliar with Scots pine |
| I like Scots pine             | <input type="radio"/> | <input type="radio"/> | <input type="radio"/> | <input type="radio"/> | <input type="radio"/> | I don't like Scots pine         |

In your view, how would you describe Scots pine with respect to the following attributes? don't know  
N/A

|                                     |                       |                       |                       |                       |                       |                                      |                       |
|-------------------------------------|-----------------------|-----------------------|-----------------------|-----------------------|-----------------------|--------------------------------------|-----------------------|
| ugly                                | <input type="radio"/> | <input type="radio"/> | <input type="radio"/> | <input type="radio"/> | <input type="radio"/> | beautiful                            | <input type="radio"/> |
| detrimental to the economy          | <input type="radio"/> | <input type="radio"/> | <input type="radio"/> | <input type="radio"/> | <input type="radio"/> | beneficial to the economy            | <input type="radio"/> |
| beneficial to nature                | <input type="radio"/> | <input type="radio"/> | <input type="radio"/> | <input type="radio"/> | <input type="radio"/> | detrimental to nature                | <input type="radio"/> |
| non-native                          | <input type="radio"/> | <input type="radio"/> | <input type="radio"/> | <input type="radio"/> | <input type="radio"/> | native                               | <input type="radio"/> |
| accidentally introduced             | <input type="radio"/> | <input type="radio"/> | <input type="radio"/> | <input type="radio"/> | <input type="radio"/> | intentionally introduced             | <input type="radio"/> |
| uncontrollable                      | <input type="radio"/> | <input type="radio"/> | <input type="radio"/> | <input type="radio"/> | <input type="radio"/> | controllable                         | <input type="radio"/> |
| rare                                | <input type="radio"/> | <input type="radio"/> | <input type="radio"/> | <input type="radio"/> | <input type="radio"/> | overabundant                         | <input type="radio"/> |
| introduced by humans                | <input type="radio"/> | <input type="radio"/> | <input type="radio"/> | <input type="radio"/> | <input type="radio"/> | natural range expansion              | <input type="radio"/> |
| <u>not</u> a severe problem         | <input type="radio"/> | <input type="radio"/> | <input type="radio"/> | <input type="radio"/> | <input type="radio"/> | a severe problem                     |                       |
| need to reduce numbers              | <input type="radio"/> | <input type="radio"/> | <input type="radio"/> | <input type="radio"/> | <input type="radio"/> | <u>no</u> need to reduce numbers     |                       |
| killing Scots pine is <u>not</u> ok | <input type="radio"/> | <input type="radio"/> | <input type="radio"/> | <input type="radio"/> | <input type="radio"/> | killing Scots pine is ok             |                       |
| has same rights as humans           | <input type="radio"/> | <input type="radio"/> | <input type="radio"/> | <input type="radio"/> | <input type="radio"/> | has <u>not</u> same rights as humans |                       |

When deciding if Scots pine requires management, how important are the following categories to **you**?

|                                       | not at all important  | unimportant           | neither nor           | important             | very important        |
|---------------------------------------|-----------------------|-----------------------|-----------------------|-----------------------|-----------------------|
| beautiful/ugly                        | <input type="radio"/> | <input type="radio"/> | <input type="radio"/> | <input type="radio"/> | <input type="radio"/> |
| beneficial/detrimental to economy     | <input type="radio"/> | <input type="radio"/> | <input type="radio"/> | <input type="radio"/> | <input type="radio"/> |
| beneficial/detrimental to nature      | <input type="radio"/> | <input type="radio"/> | <input type="radio"/> | <input type="radio"/> | <input type="radio"/> |
| native/non-native                     | <input type="radio"/> | <input type="radio"/> | <input type="radio"/> | <input type="radio"/> | <input type="radio"/> |
| intentionally/accidentally introduced | <input type="radio"/> | <input type="radio"/> | <input type="radio"/> | <input type="radio"/> | <input type="radio"/> |
| controllable/uncontrollable           | <input type="radio"/> | <input type="radio"/> | <input type="radio"/> | <input type="radio"/> | <input type="radio"/> |
| rare/overabundant                     | <input type="radio"/> | <input type="radio"/> | <input type="radio"/> | <input type="radio"/> | <input type="radio"/> |
| human-caused/natural                  | <input type="radio"/> | <input type="radio"/> | <input type="radio"/> | <input type="radio"/> | <input type="radio"/> |

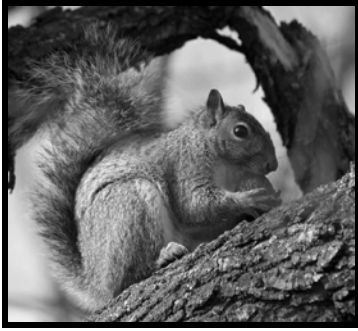

## Grey squirrel

|                                      |                       |                       |                       |                       |                       |                                        |
|--------------------------------------|-----------------------|-----------------------|-----------------------|-----------------------|-----------------------|----------------------------------------|
| I am familiar with the grey squirrel | <input type="radio"/> | <input type="radio"/> | <input type="radio"/> | <input type="radio"/> | <input type="radio"/> | I am unfamiliar with the grey squirrel |
| I like the grey squirrel             | <input type="radio"/> | <input type="radio"/> | <input type="radio"/> | <input type="radio"/> | <input type="radio"/> | I don't like the grey squirrel         |

In your view, how would you describe the grey squirrel with respect to the following attributes? don't know  
N/A

|                                      |                       |                       |                       |                       |                       |                                      |                       |
|--------------------------------------|-----------------------|-----------------------|-----------------------|-----------------------|-----------------------|--------------------------------------|-----------------------|
| ugly                                 | <input type="radio"/> | <input type="radio"/> | <input type="radio"/> | <input type="radio"/> | <input type="radio"/> | beautiful                            | <input type="radio"/> |
| detrimental to the economy           | <input type="radio"/> | <input type="radio"/> | <input type="radio"/> | <input type="radio"/> | <input type="radio"/> | beneficial to the economy            | <input type="radio"/> |
| beneficial to nature                 | <input type="radio"/> | <input type="radio"/> | <input type="radio"/> | <input type="radio"/> | <input type="radio"/> | detrimental to nature                | <input type="radio"/> |
| non-native                           | <input type="radio"/> | <input type="radio"/> | <input type="radio"/> | <input type="radio"/> | <input type="radio"/> | native                               | <input type="radio"/> |
| accidentally introduced              | <input type="radio"/> | <input type="radio"/> | <input type="radio"/> | <input type="radio"/> | <input type="radio"/> | intentionally introduced             | <input type="radio"/> |
| uncontrollable                       | <input type="radio"/> | <input type="radio"/> | <input type="radio"/> | <input type="radio"/> | <input type="radio"/> | controllable                         | <input type="radio"/> |
| rare                                 | <input type="radio"/> | <input type="radio"/> | <input type="radio"/> | <input type="radio"/> | <input type="radio"/> | overabundant                         | <input type="radio"/> |
| introduced by humans                 | <input type="radio"/> | <input type="radio"/> | <input type="radio"/> | <input type="radio"/> | <input type="radio"/> | natural range expansion              | <input type="radio"/> |
| <u>not</u> a severe problem          | <input type="radio"/> | <input type="radio"/> | <input type="radio"/> | <input type="radio"/> | <input type="radio"/> | a severe problem                     |                       |
| need to reduce numbers               | <input type="radio"/> | <input type="radio"/> | <input type="radio"/> | <input type="radio"/> | <input type="radio"/> | <u>no</u> need to reduce numbers     |                       |
| killing grey squirrels is <u>not</u> | <input type="radio"/> | <input type="radio"/> | <input type="radio"/> | <input type="radio"/> | <input type="radio"/> | killing grey squirrels is ok         |                       |
| has same rights as humans            | <input type="radio"/> | <input type="radio"/> | <input type="radio"/> | <input type="radio"/> | <input type="radio"/> | has <u>not</u> same rights as humans |                       |

When deciding if grey squirrels require management, how important are the following categories to **you**?

|                                       | not at all important  | un-important          | neither nor           | important             | very important        |
|---------------------------------------|-----------------------|-----------------------|-----------------------|-----------------------|-----------------------|
| beautiful/ugly                        | <input type="radio"/> | <input type="radio"/> | <input type="radio"/> | <input type="radio"/> | <input type="radio"/> |
| beneficial/detrimental to economy     | <input type="radio"/> | <input type="radio"/> | <input type="radio"/> | <input type="radio"/> | <input type="radio"/> |
| beneficial/detrimental to nature      | <input type="radio"/> | <input type="radio"/> | <input type="radio"/> | <input type="radio"/> | <input type="radio"/> |
| native/non-native                     | <input type="radio"/> | <input type="radio"/> | <input type="radio"/> | <input type="radio"/> | <input type="radio"/> |
| intentionally/accidentally introduced | <input type="radio"/> | <input type="radio"/> | <input type="radio"/> | <input type="radio"/> | <input type="radio"/> |
| controllable/uncontrollable           | <input type="radio"/> | <input type="radio"/> | <input type="radio"/> | <input type="radio"/> | <input type="radio"/> |
| rare/overabundant                     | <input type="radio"/> | <input type="radio"/> | <input type="radio"/> | <input type="radio"/> | <input type="radio"/> |
| human-caused/natural                  | <input type="radio"/> | <input type="radio"/> | <input type="radio"/> | <input type="radio"/> | <input type="radio"/> |



Now, we would like to ask you about your views on nature and life in general. Again, this is about your personal opinion and there are no right or wrong responses.

|                                                                                                                                    | strongly disagree | disagree | neutral | agree | strongly agree |
|------------------------------------------------------------------------------------------------------------------------------------|-------------------|----------|---------|-------|----------------|
| I believe if humans mistreat nature, they will suffer environmental catastrophes                                                   | 0                 | 0        | 0       | 0     | 0              |
| Only if we treat nature with respect will humankind be able to survive                                                             | 0                 | 0        | 0       | 0     | 0              |
| I care about animals as I do about other people                                                                                    | 0                 | 0        | 0       | 0     | 0              |
| I think humankind cannot expect a future worth living if we are abusing nature                                                     | 0                 | 0        | 0       | 0     | 0              |
| I don't think that respect for nature will save us from any environmental catastrophe                                              | 0                 | 0        | 0       | 0     | 0              |
| I feel a strong emotional bond with nature                                                                                         | 0                 | 0        | 0       | 0     | 0              |
| I think humans don't deserve benefits from nature, if they mistreat it                                                             | 0                 | 0        | 0       | 0     | 0              |
| Animals should have rights similar to the rights of humans                                                                         | 0                 | 0        | 0       | 0     | 0              |
| Environmental catastrophes are even worse when humans are responsible for them                                                     | 0                 | 0        | 0       | 0     | 0              |
| I view all living things as part of one big family                                                                                 | 0                 | 0        | 0       | 0     | 0              |
| I think basically the world is a just place                                                                                        | 0                 | 0        | 0       | 0     | 0              |
| I believe that, by and large, people get what they deserve                                                                         | 0                 | 0        | 0       | 0     | 0              |
| I am confident that justice always prevails over injustice                                                                         | 0                 | 0        | 0       | 0     | 0              |
| I am confident that in the long run, people will be compensated for injustices                                                     | 0                 | 0        | 0       | 0     | 0              |
| I firmly believe that injustices in all areas of life (e.g. professional, family, politics) are the exception rather than the rule | 0                 | 0        | 0       | 0     | 0              |
| I think people try to be fair when making important decisions                                                                      | 0                 | 0        | 0       | 0     | 0              |

Now follow a few questions about you. It is important to us that you answer these questions as well so that we can understand how different groups in society view these issues.

How old are you? \_\_\_\_\_ years I am  female  male

In which country did you grow up? \_\_\_\_\_

- 
- I get most of my information regarding nature, animals and plants from: (you may tick more than one option!)
- Newspapers
  - Television/Radio
  - Own observations
  - School, university
  - Leaflets/magazines from governmental organisations
  - Leaflets/magazines from non-governmental organisations
  - Internet
  - Conversations with friends or family
  - Scientific journals
  - Others, namely:
- 

- 
- What is your highest educational attainment?
- Primary school
  - Secondary school
  - Sixth form
  - HND
  - Degree (e.g. BSc/Ba)
  - Higher degree (Ms/PhD)
- 

- 
- What describes your daily occupation best?
- Employed full-time
  - Employed part-time
  - Self-employed
  - Unemployed
  - Retired, pensioner
  - Homemaker
  - Studying/vocational training
  - Others, namely:
- 

- 
- How would you describe the area you live in?
- City
  - Small town
  - Rural area
-

---

How would you describe yourself?

| I would consider myself... | strongly disagree | disagree | neutral | agree | strongly agree |
|----------------------------|-------------------|----------|---------|-------|----------------|
| a farmer                   | 0                 | 0        | 0       | 0     | 0              |
| a conservationist          | 0                 | 0        | 0       | 0     | 0              |
| a nature-loving person     | 0                 | 0        | 0       | 0     | 0              |
| a birdwatcher              | 0                 | 0        | 0       | 0     | 0              |
| a outdoor sport enthusiast | 0                 | 0        | 0       | 0     | 0              |
| a gardener                 | 0                 | 0        | 0       | 0     | 0              |
| others: _____              | 0                 | 0        | 0       | 0     | 0              |

If you have any remarks or comments please write them down here:

---

---

---

---

**Thank you very much for your participation!**

Please return the completed questionnaire by 23 June 2010 using the FREEPOST envelope provided.

Sebastian Selge  
Socio-Economic Research Group  
Macaulay Land Use Research Institute  
Craigiebuckler  
Aberdeen AB15 8QH

Please return the completed questionnaire by 23 June 2010 using the FREEPOST envelope provided.

Many thanks!
